# Supplementary material
Source: PubMed Central journal article supplement (PMC6084461)
Supplement: NIHMS971490-supplement.pdf [file NIHMS971490-supplement.pdf]

## Supplementary Information

# Facilely Accessible Quinoline Derivatives as Potent Antibacterial Agents

Peng Teng,<sup>†,a</sup> Chunhui Li,<sup>‡,§,a</sup> Zhong Peng,<sup>‡,l,a</sup> Annemarie Vanderschouw,<sup>†</sup> Alekhya

Nimmagadda,<sup>†</sup> Ma Su,<sup>†</sup> Yaqiong Li,<sup>†</sup> Xingmin Sun,<sup>‡,\*</sup> and Jianfeng Cai<sup>†,\*</sup>

<sup>†</sup>Department of Chemistry, University of South Florida, 4202 E. Fowler Ave, Tampa, FL 33620, USA

<sup>‡</sup>College of Medicine Molecular Medicine, University of South Florida, 12901 Bruce B. Down Blvd, Tampa, FL 33612, USA

<sup>§</sup>Department of Infection Control Center of Xiangya Hospital, Central South University, Changsha, 410008, China

<sup>l</sup>State Key Laboratory of Agricultural Microbiology, College of Veterinary Medicine, Huazhong Agricultural University, Wuhan, Hubei, 430070, China

<sup>a</sup>These authors contributed to the work equally.

### Contents:

|                                                                                                                               |         |
|-------------------------------------------------------------------------------------------------------------------------------|---------|
| 1. <sup>1</sup> HNMR and <sup>13</sup> CNMR spectra of compounds <b>1–8</b> .....                                             | S2–S9   |
| 2. HPLC trace of compounds <b>1–8</b> .....                                                                                   | S10–S11 |
| 3. Figure S1. Experimental Scheme for evaluation of compound <b>6</b> in a mouse model of <i>C. difficile</i> infection ..... | S11     |

1.  $^1\text{H}$  NMR and  $^{13}\text{C}$  NMR spectra of compounds 1–8.

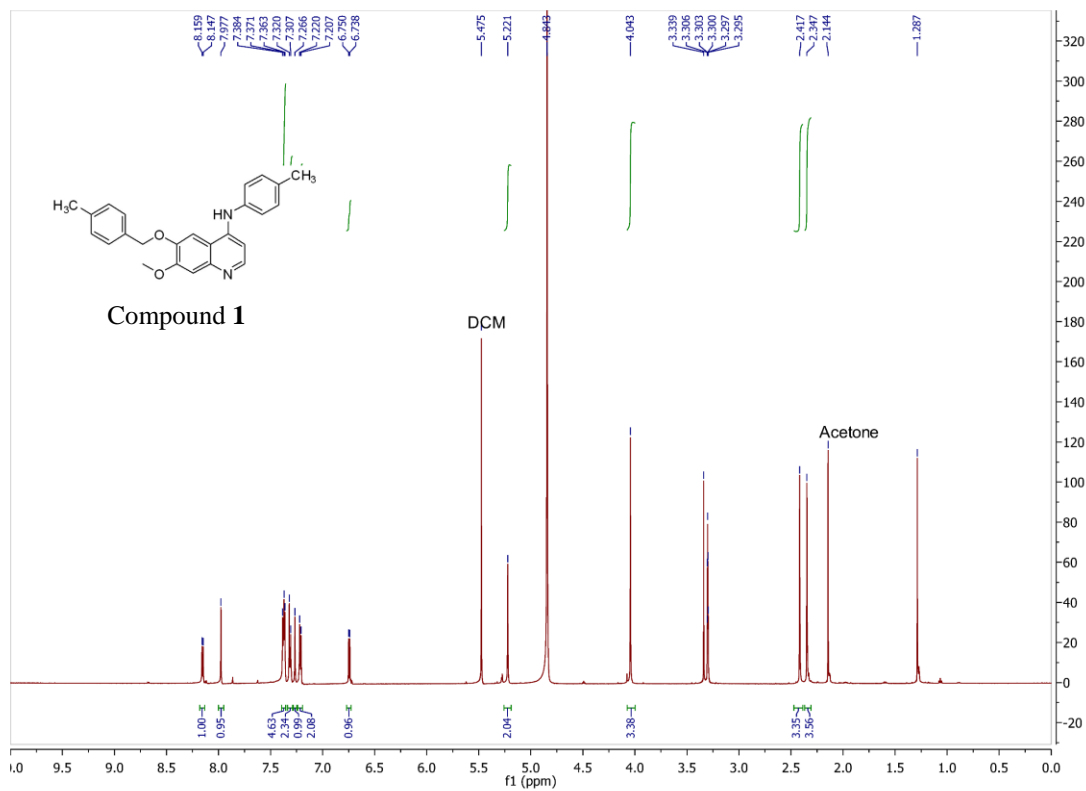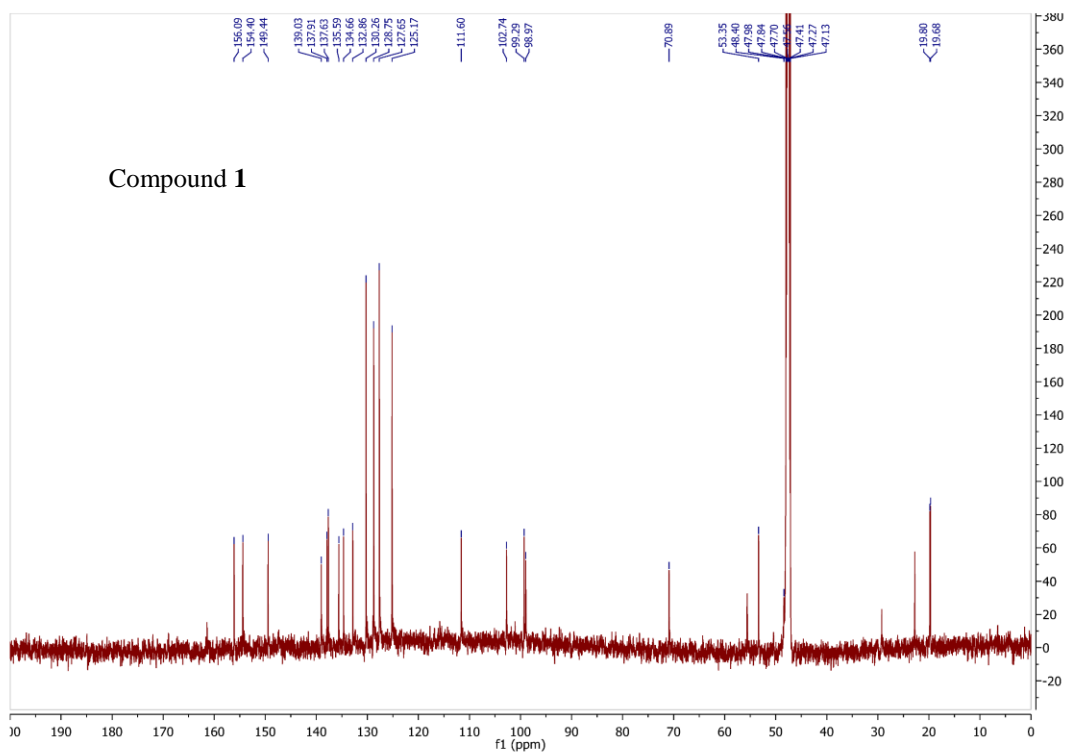

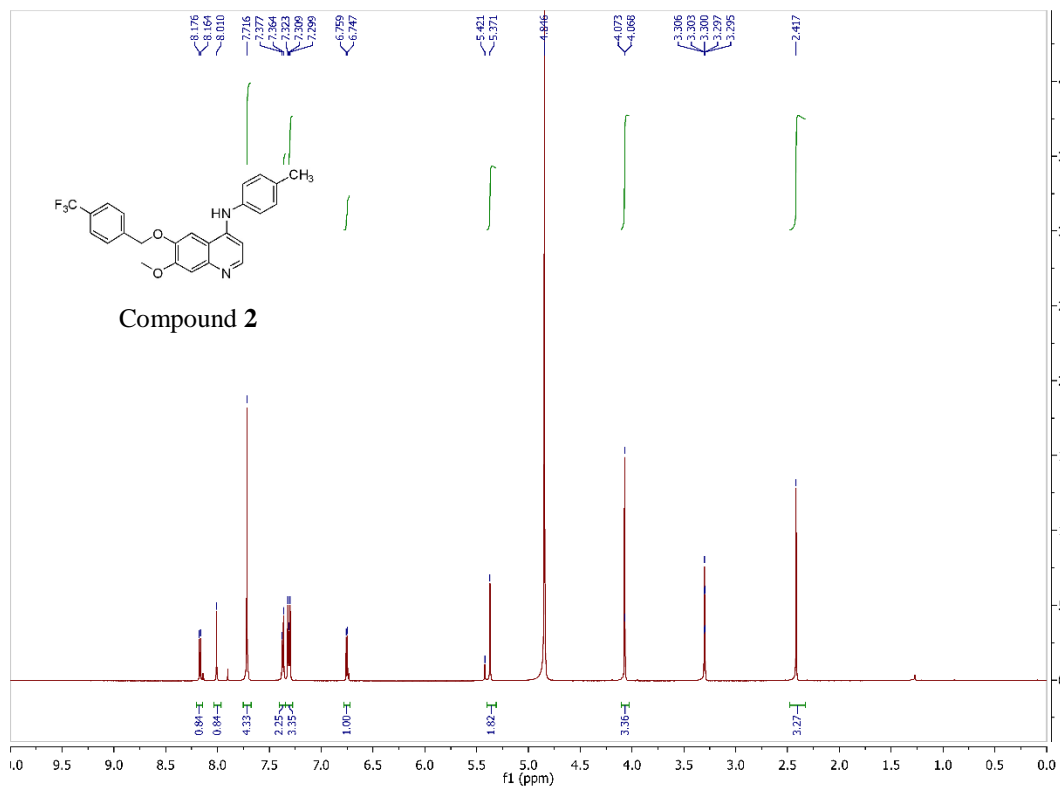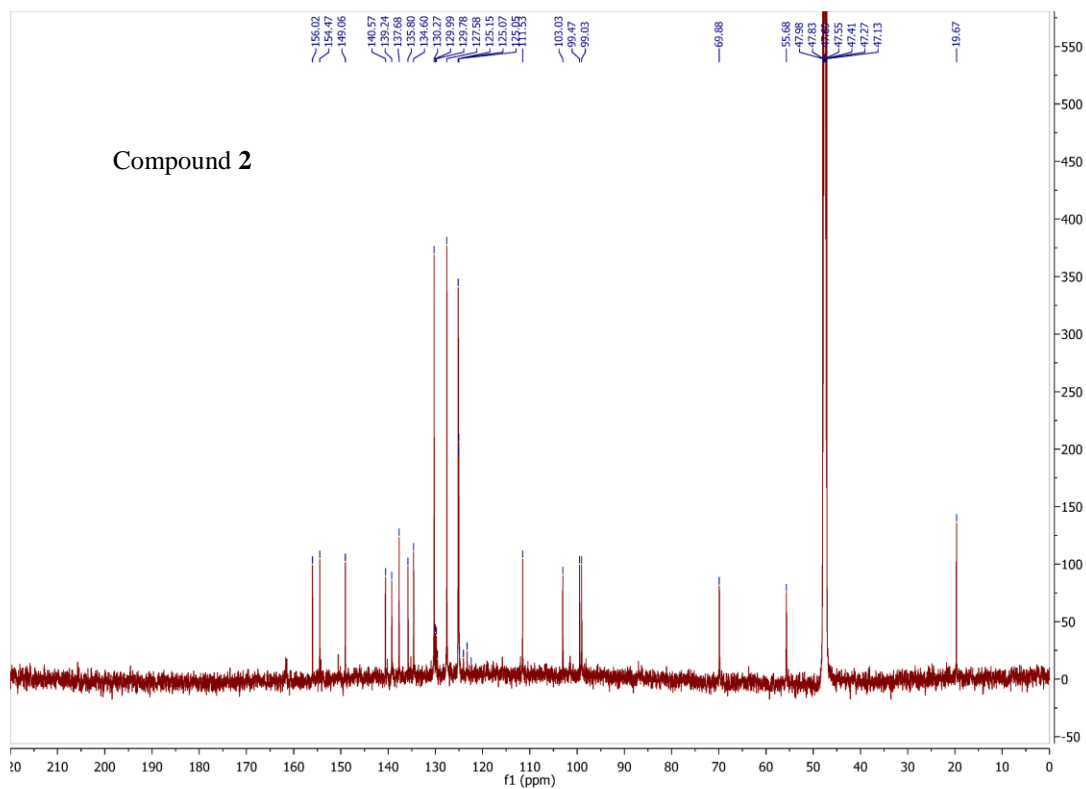

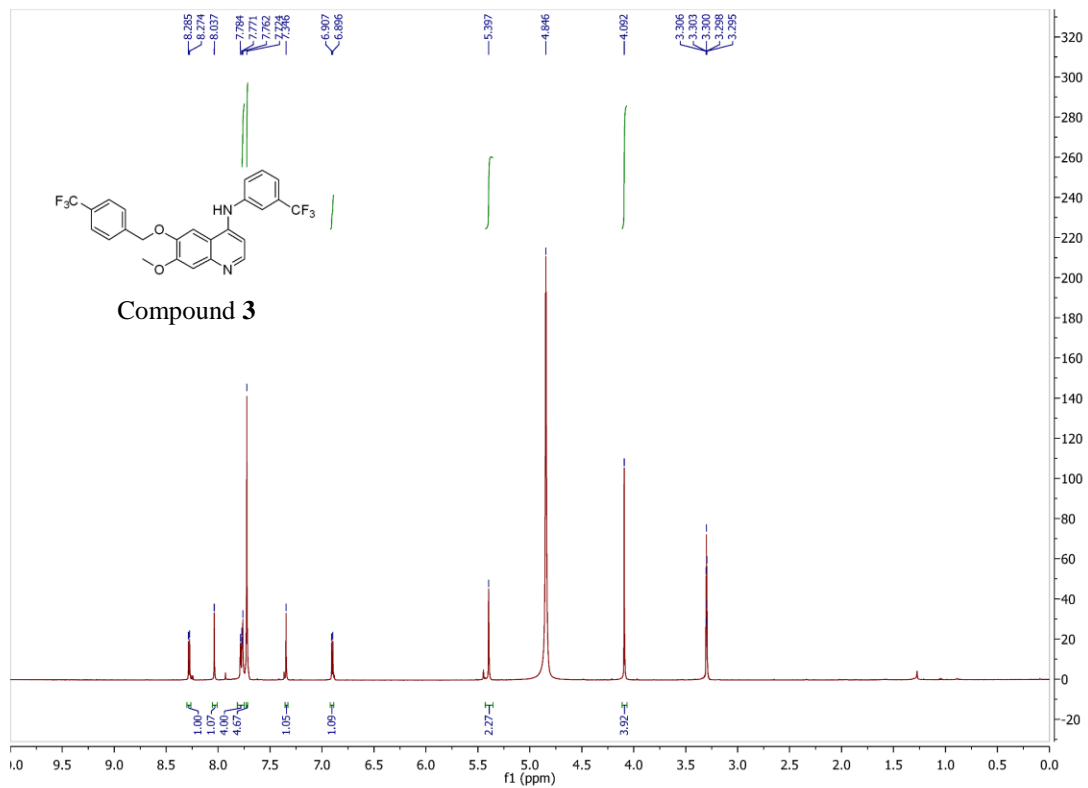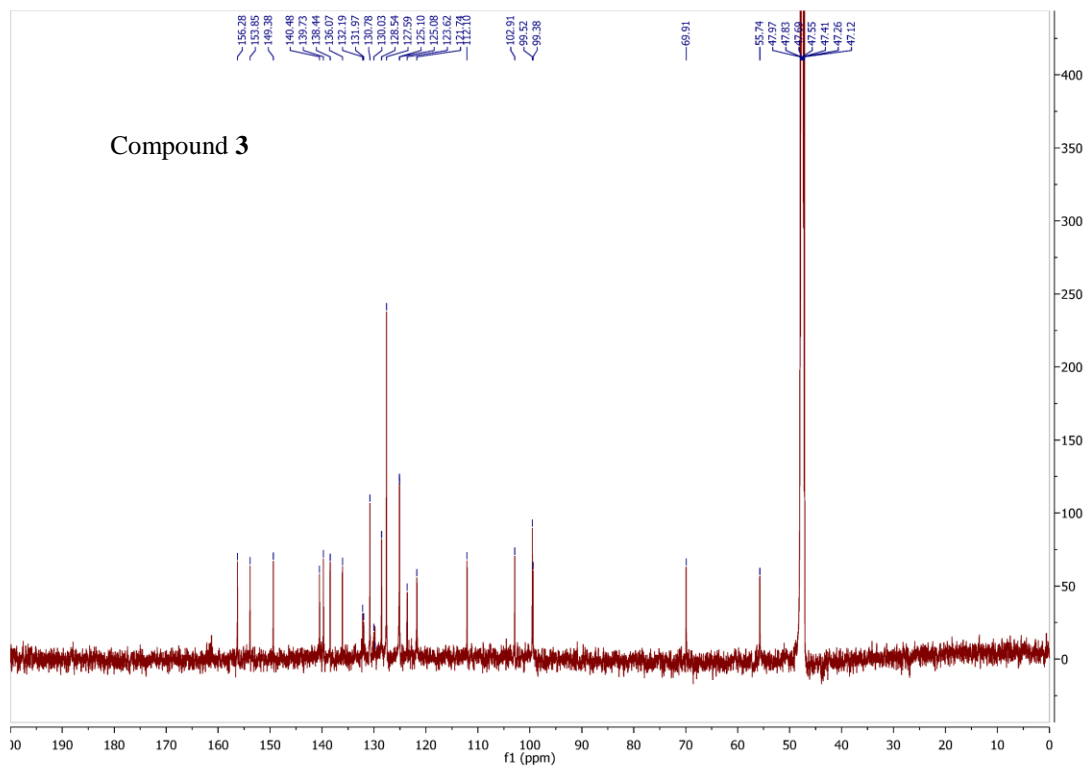

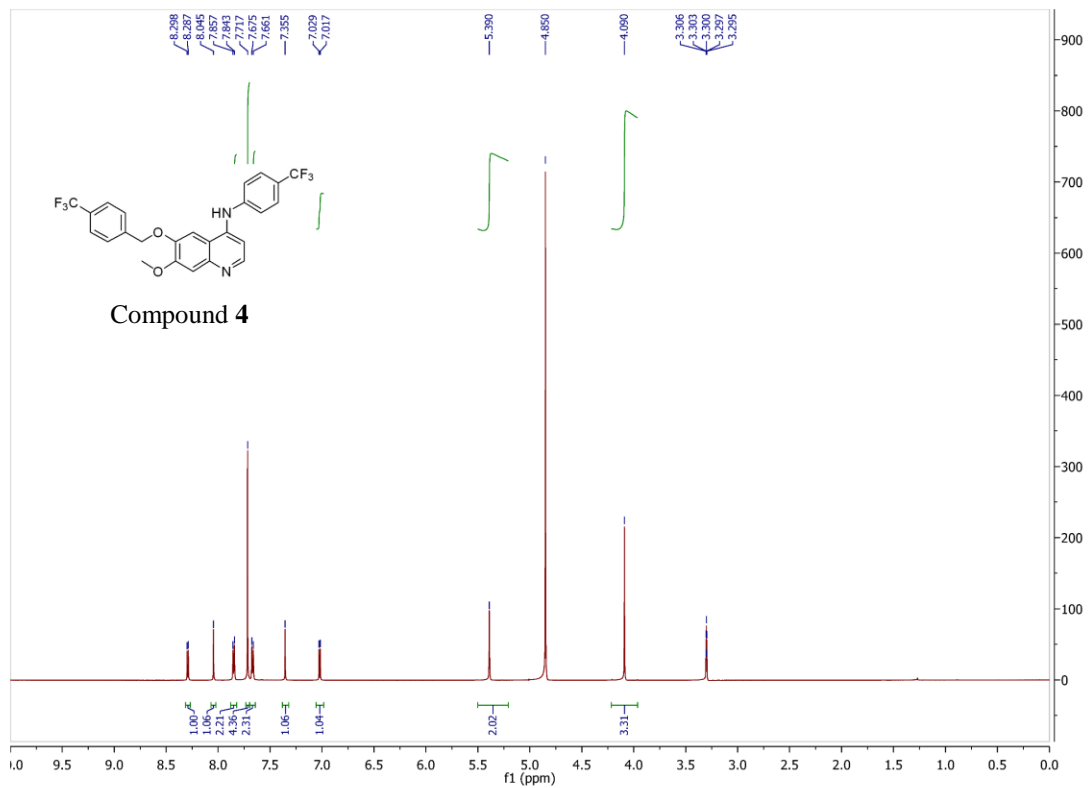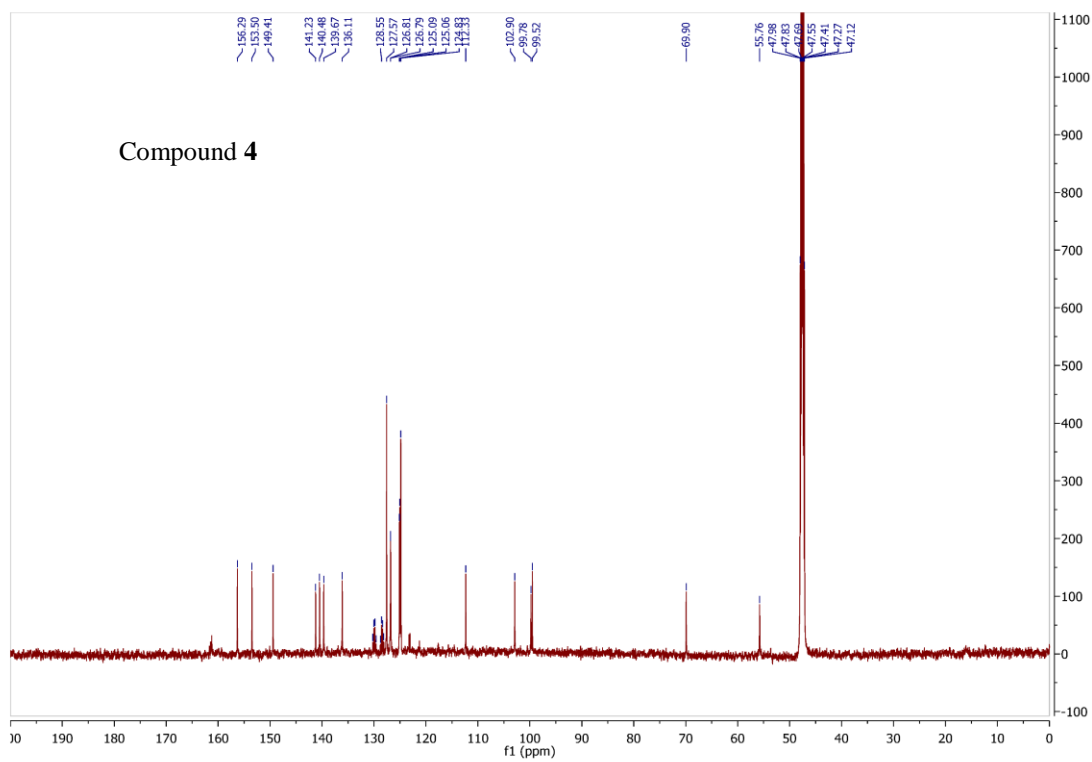

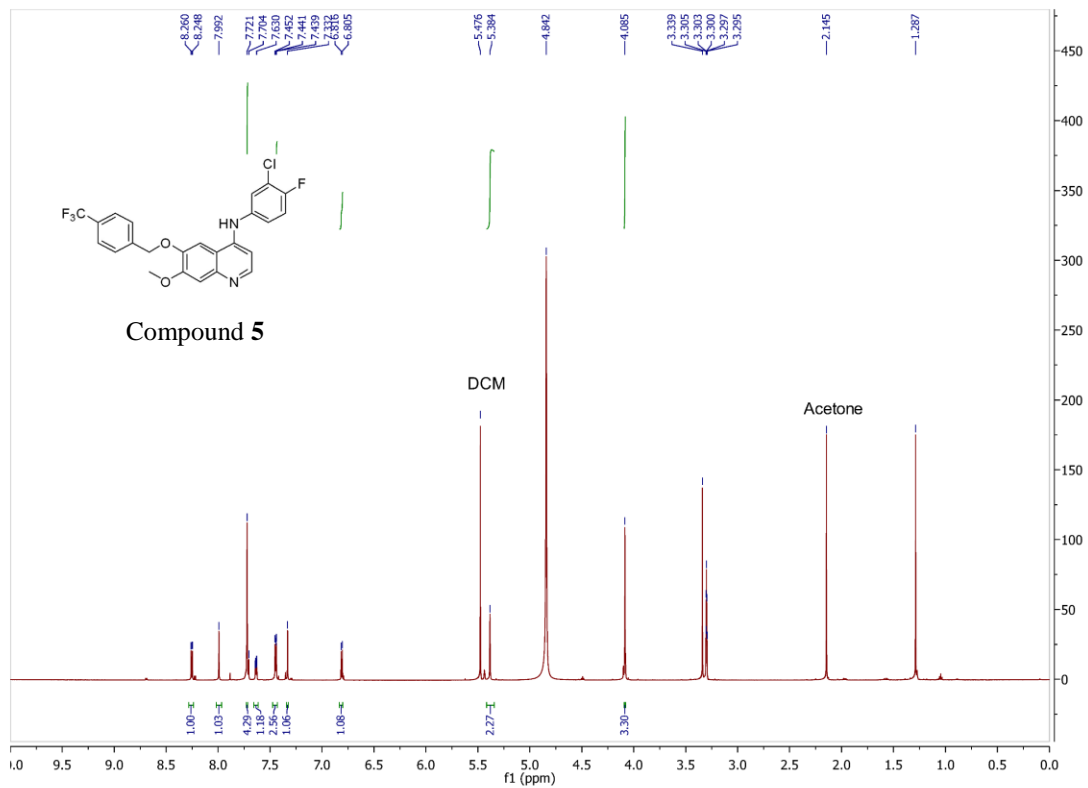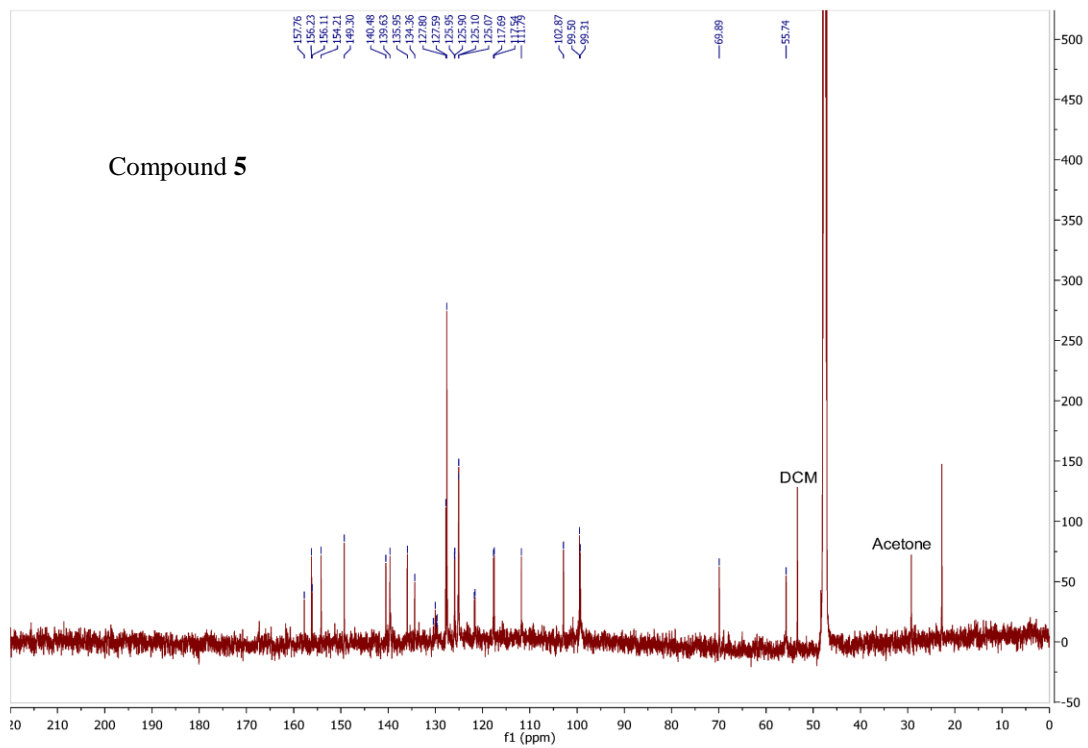

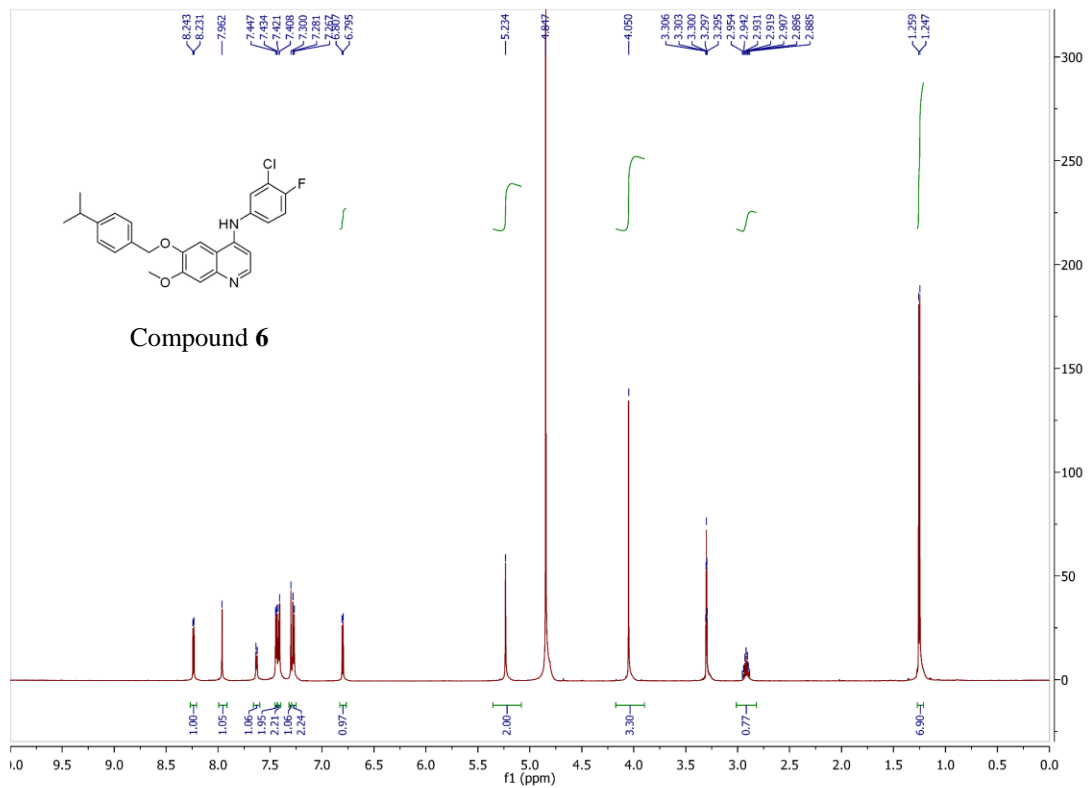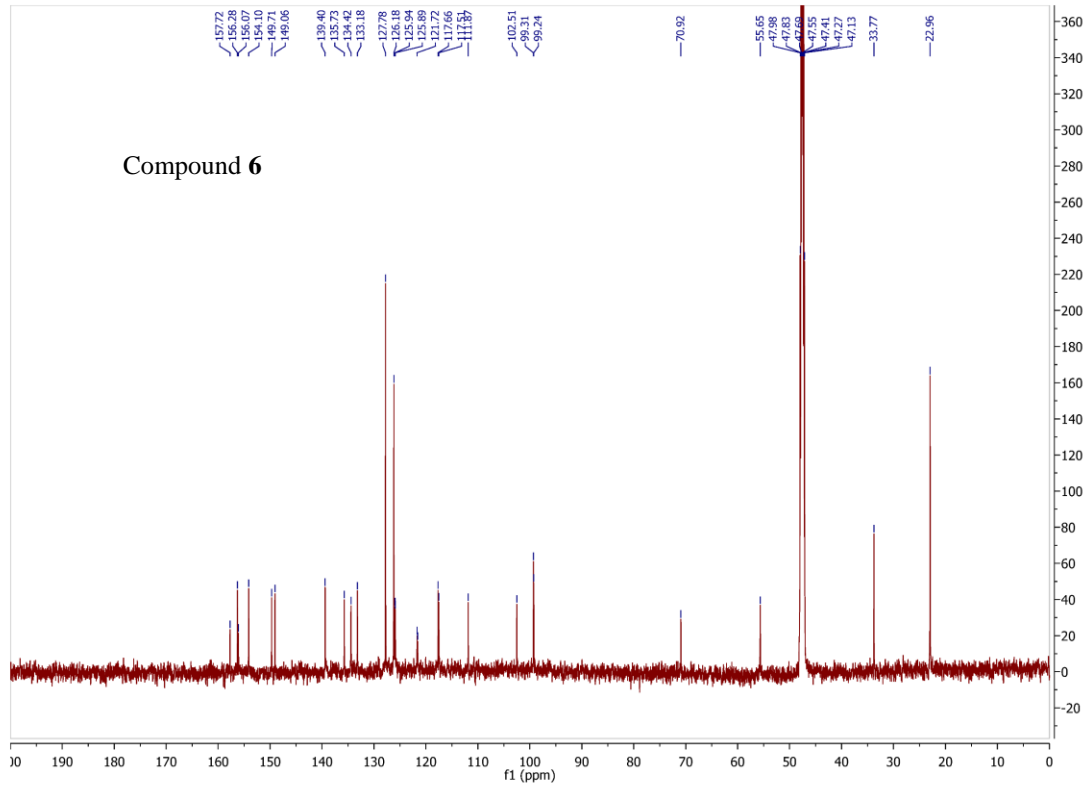

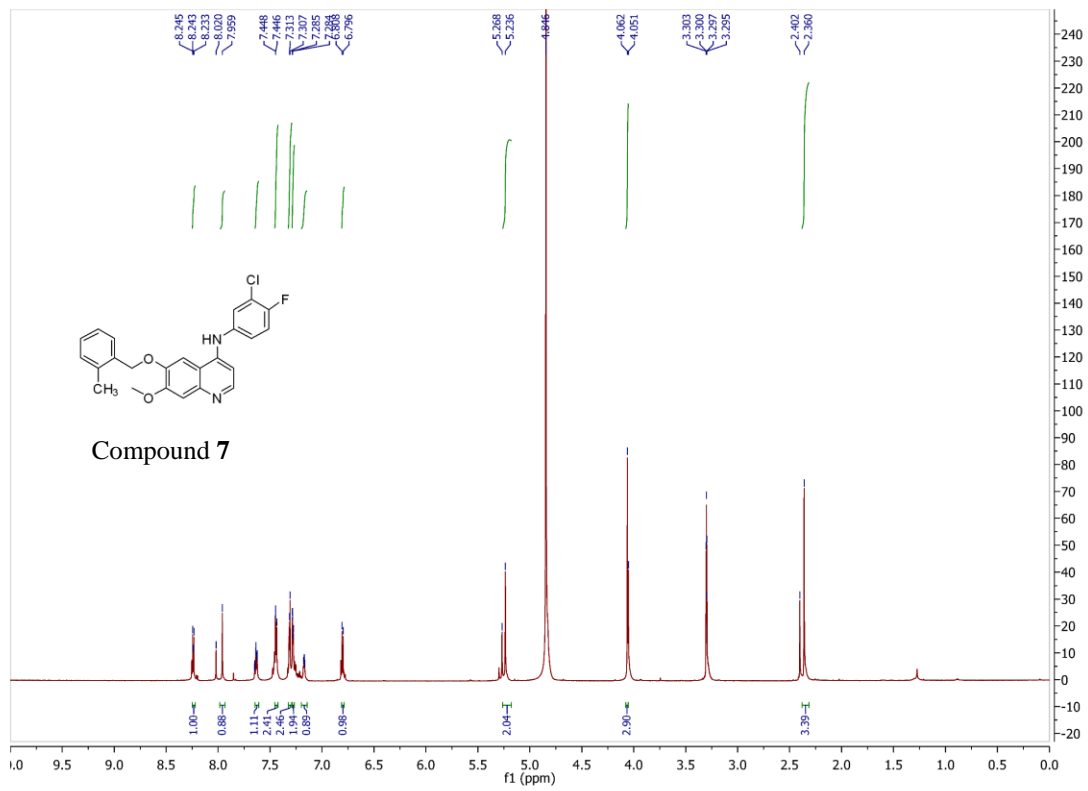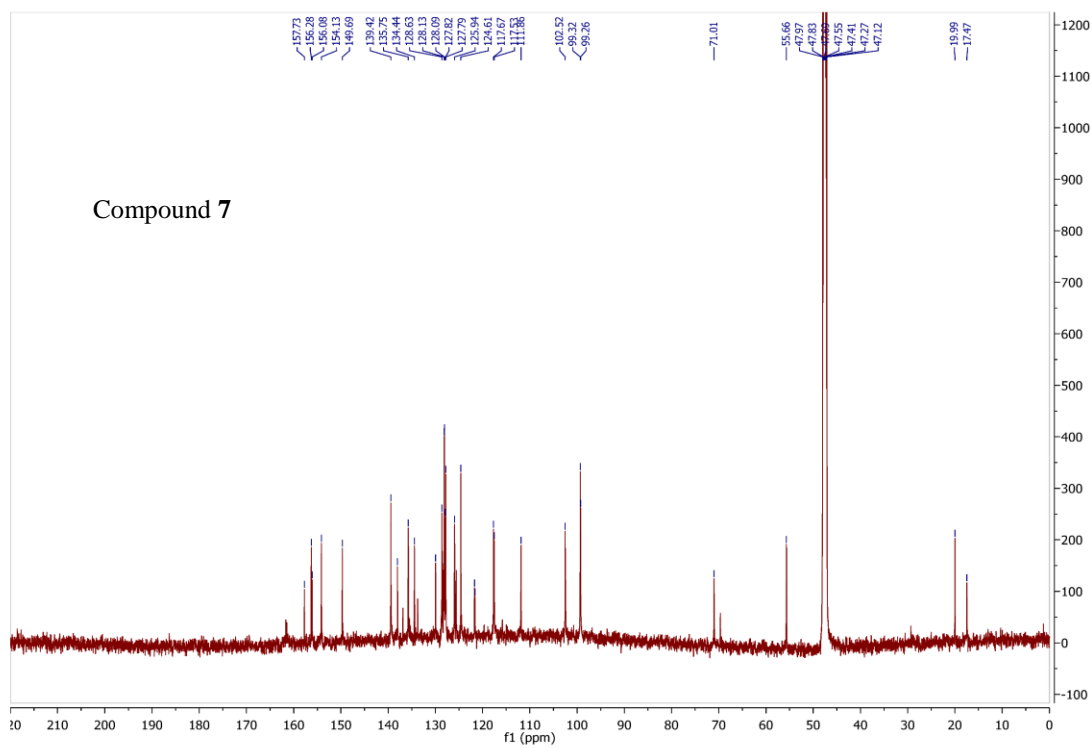





## 2. HPLC trace of compounds 1–8.

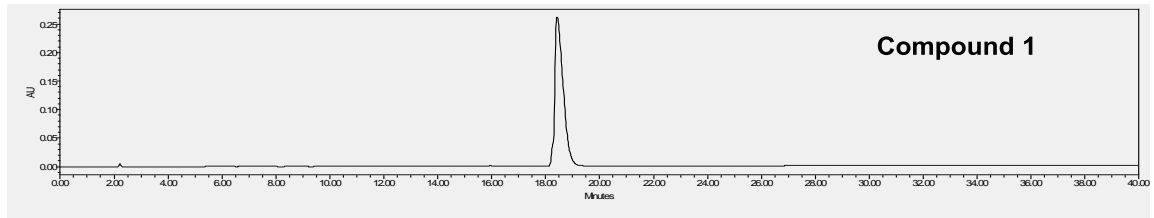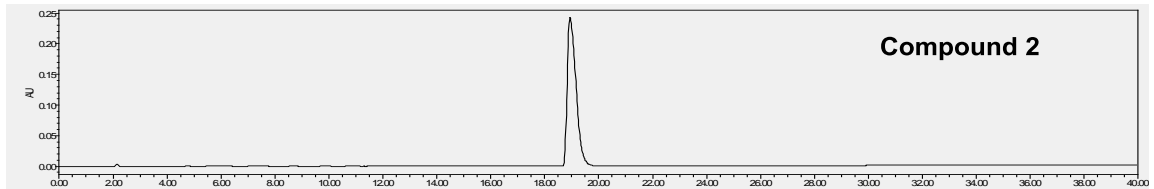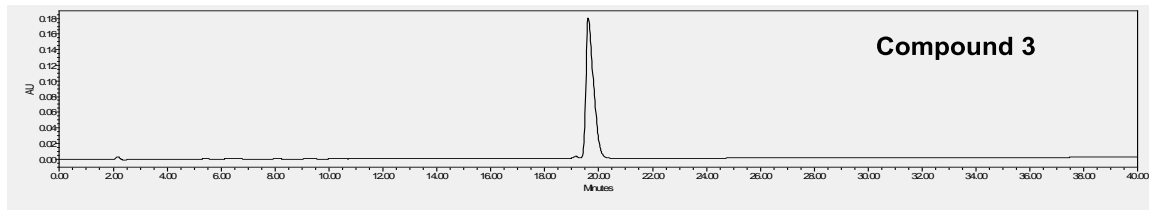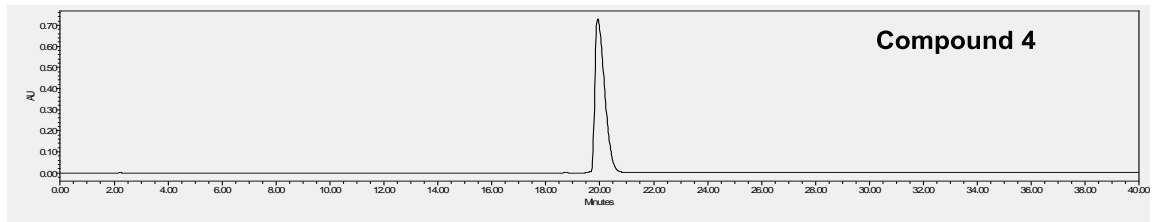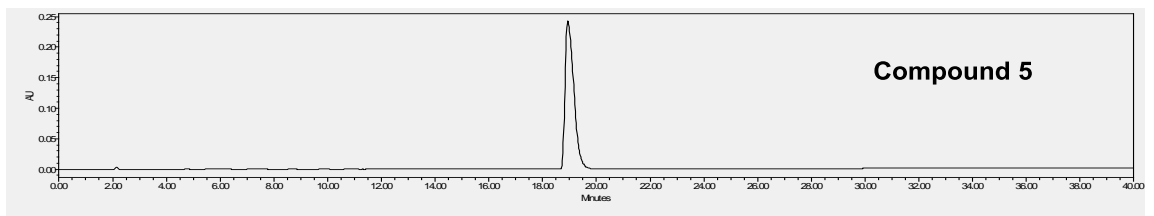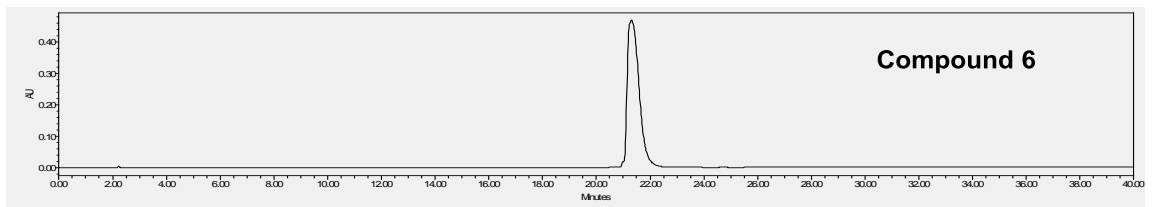

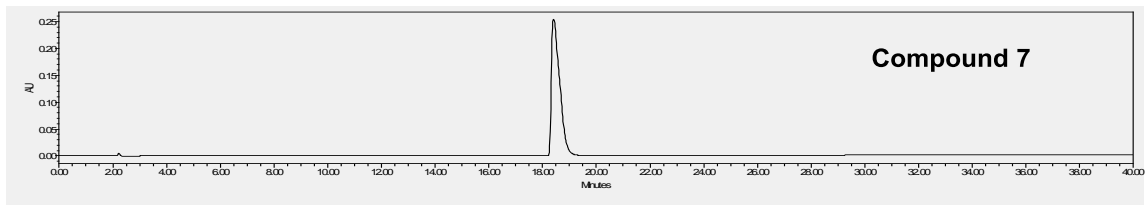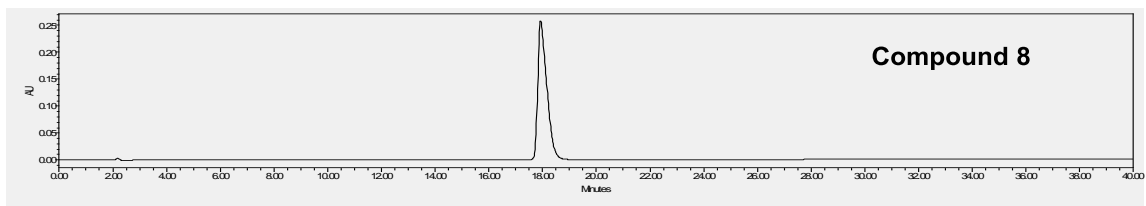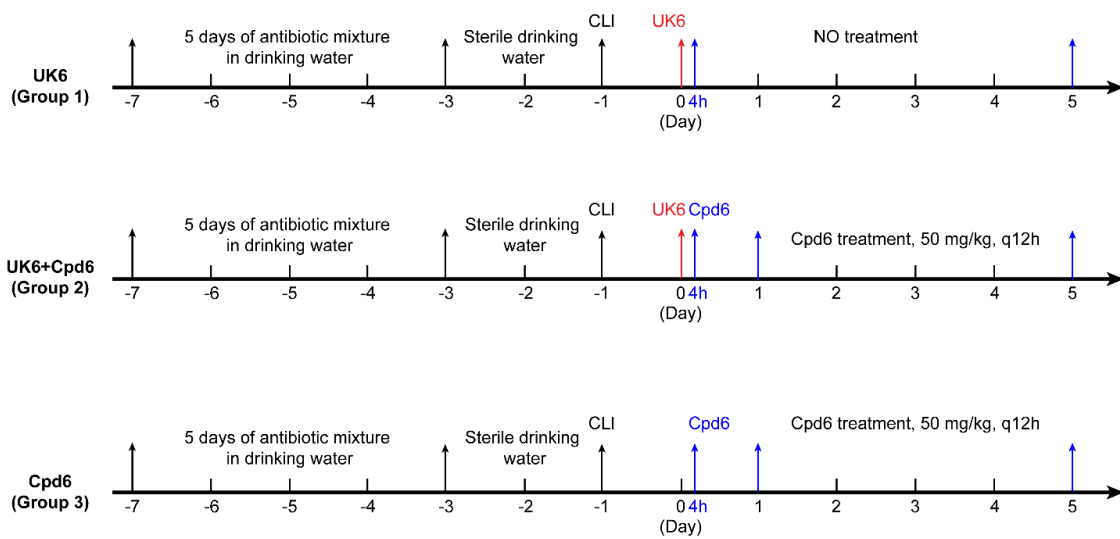

**Figure S1. Experimental scheme for evaluation of compound 6 (Cpd6) in a mouse model of *C. difficile* infection. Cpd6: Compound 6.**
